# Supplementary material
Source: Elsevier journal article supplement (https://www.sciencedirect.com/science/article/pii/S0300893222001257)
Supplement: mmc4 [file mmc4.pdf]

## LEYENDA DE VÍDEOS

**Vídeo 1 del material adicional.** Arteriografía pulmonar en visión lateral en la que se visualiza la anatomía del *ductus* arterioso y su conexión con la aorta descendente y las ramas pulmonares.

**Vídeo 2 del material adicional.** Arteriografía pulmonar en visión lateral tras el implante de un *stent* Sinus-SuperFlex-DS en posición ductal.

**Vídeo 3 del material adicional.** Colapso del *stent* Sinus-SuperFlex-DS en su tercio medio en visión lateral.
